# Supplementary material for: Chemical ligation of an entire DNA origami nanostructure
Source: Royal Society of Chemistry journal article supplement (doi:10.1039/d1nr04225d), 2021-01-01
Supplement: d1nr04225d1.pdf [file d1nr04225d1.pdf]

## **Supporting Information**

### **Chemical Ligation of an entire DNA Origami Nanostructure**

Nicole Weizenmann, Gerda Scheidgen-Kleyboldt, Jingjing Ye, Cordula B. Krause, Dominik Kauert, Seham Helmi, Christophe Rouillon, and Ralf Seidel\*

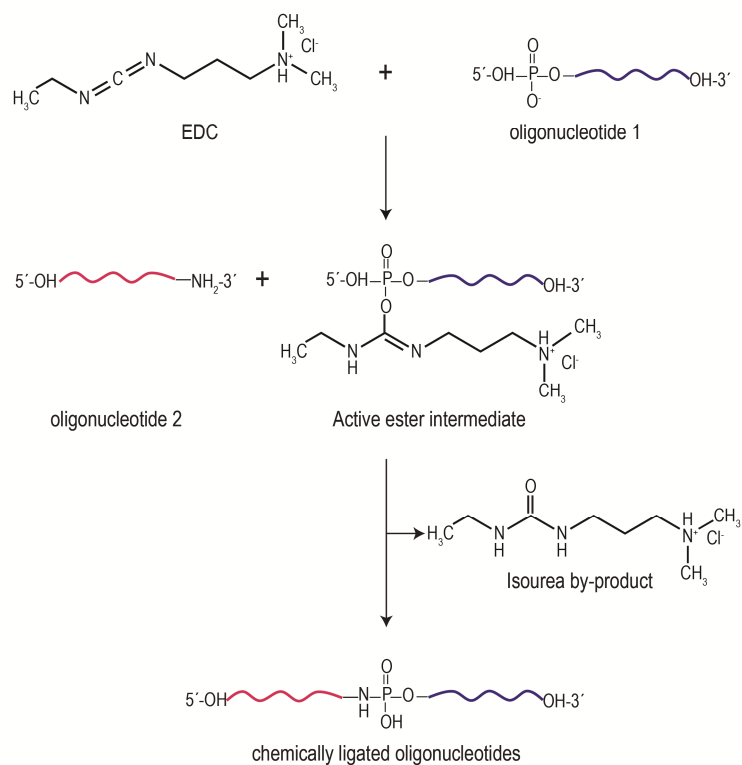

**Figure S1.** Scheme of the chemical ligation reaction, which consists of a chemoselective reaction of EDC to the 5' phosphate of an oligonucleotide 1 providing an active ester intermediate. The intermediate can be attacked by the 3' amine of an oligonucleotide 2 to create a covalent coupling between phosphate and amine which links the two oligonucleotides (adapted from Hermanson G. T., 2008).<sup>1</sup>

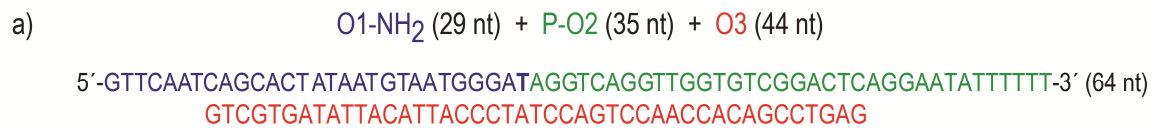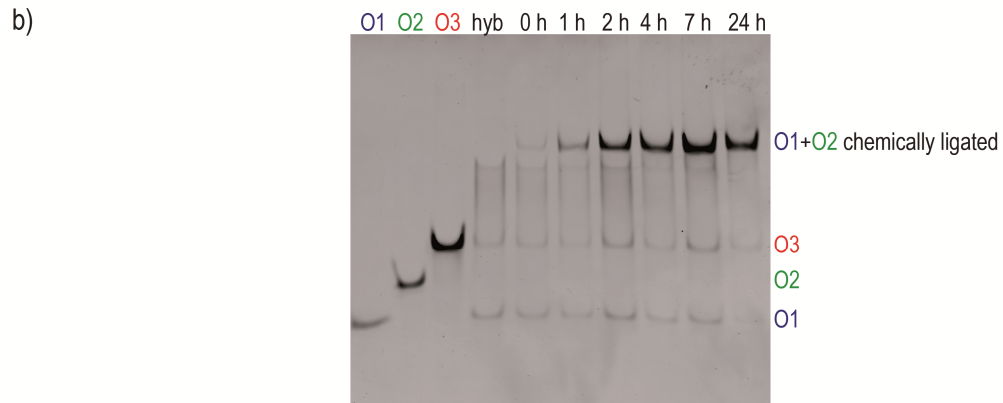

**Figure S2.** Time course of the chemical ligation reaction. a) Scheme of the employed DNA duplex with an internal nick subjected to ligation. The duplex consists of a 3' amine modified oligonucleotide O1 (in blue) and a 5' phosphorylated oligonucleotide O2 (in green), which are hybridized to a carrier oligonucleotide O3 (in red). The amine modification of O1 was accomplished by enzymatically adding the terminal thymidine (shown in bold) using 3'-Amino-2',3'-ddTTP. b) Denaturing PAGE (15 %) analysis of O1, O2 and O3, of the hybrid of the three oligonucleotides (hyb) and of the hybrid after varying time points (shown above) of the chemical ligation reaction.

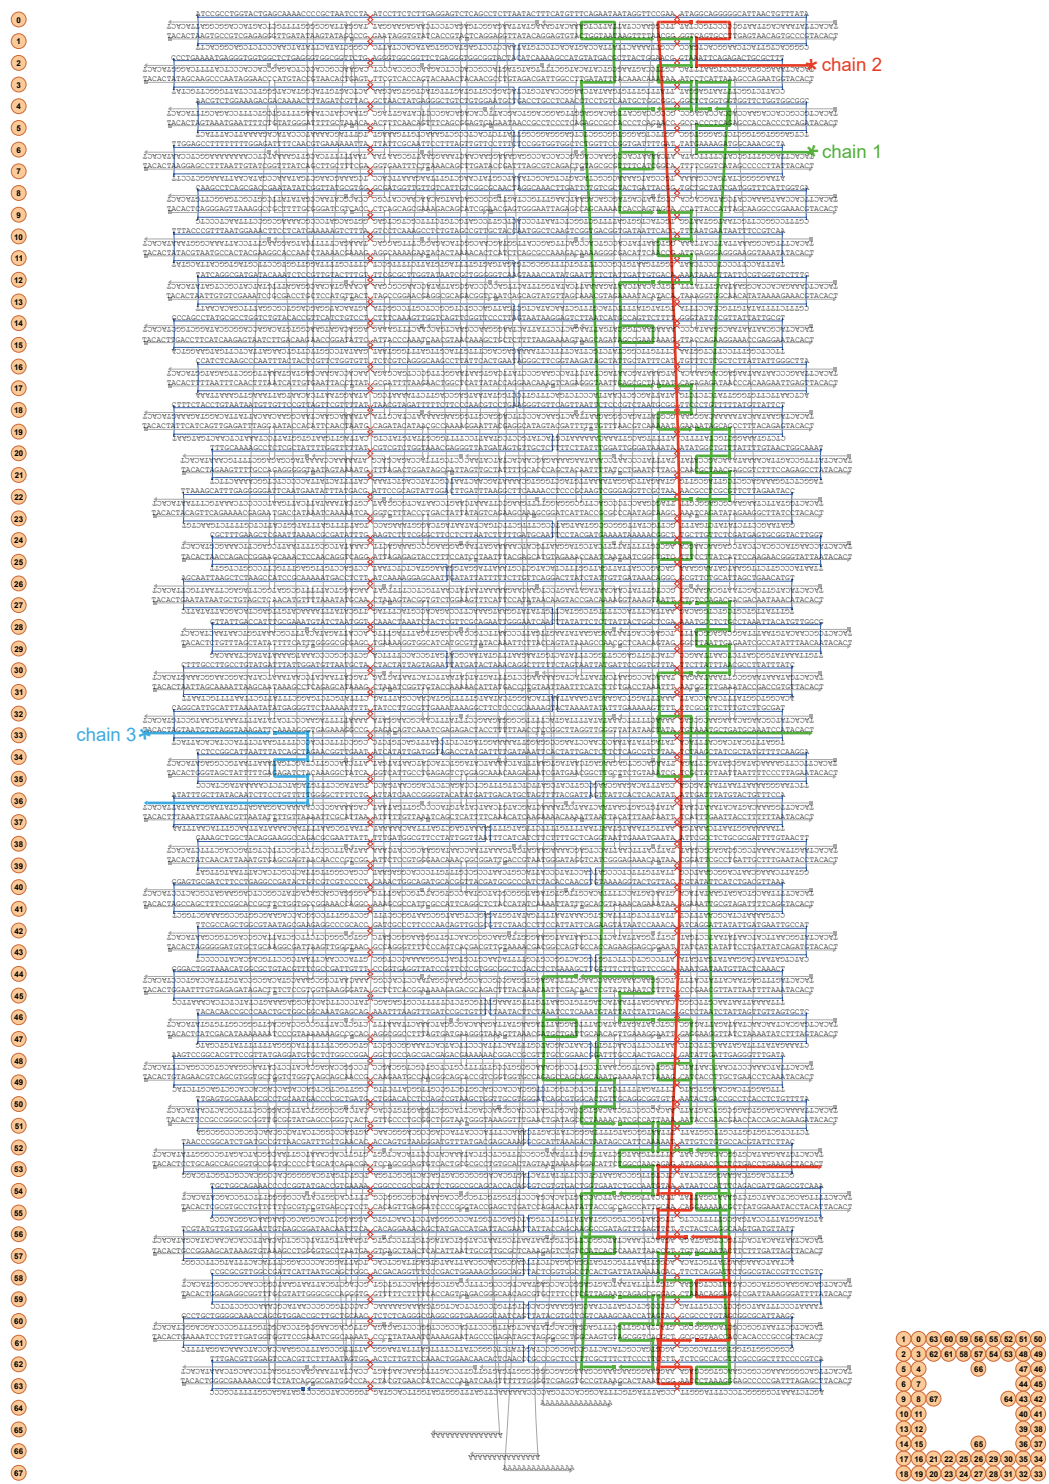

**Figure S3.** Design template of the DNA origami tube structure with highlighted set 1 staple chains. Shown are the 8064 nt scaffold (blue) and the different staples (other colors) including their sequences. Staples of the ligation chains 1, 2 and 3 (set 1) are shown in green, red and light blue, respectively (Table S1). Labels of the first staple of a particular ligation chain are marked with an asterisk.

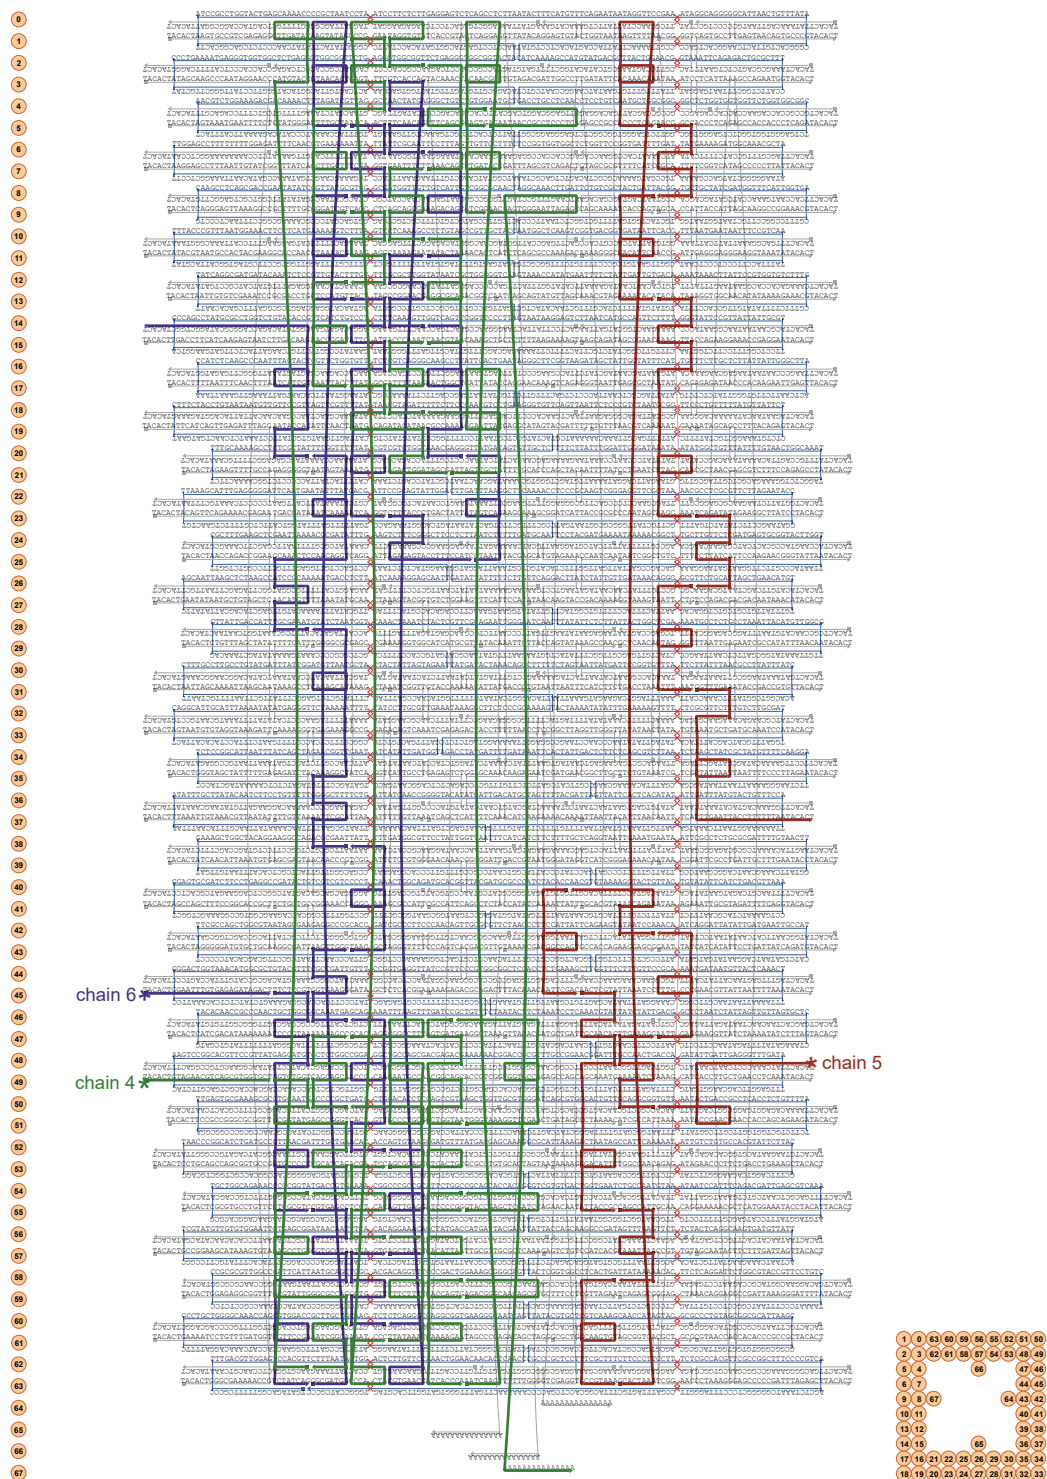

**Figure S4.** Design template of the DNA origami tube structure with highlighted set 2 staple chains. Shown are the 8064 nt scaffold (blue) and the different staples (other colors) including their sequences. Staples of the ligation chains 4, 5 and 6 (set 2) are shown in dark green, dark red and dark purple, respectively (Table S2). Labels of the first staple of a particular ligation chain are marked with an asterisk.

a) non-ligated origami

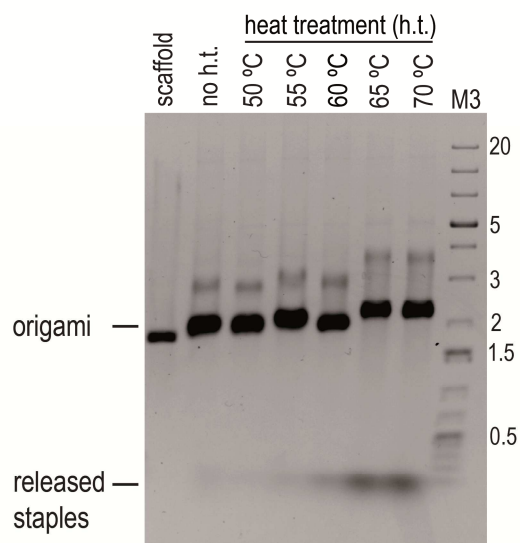

b) chemically ligated origami

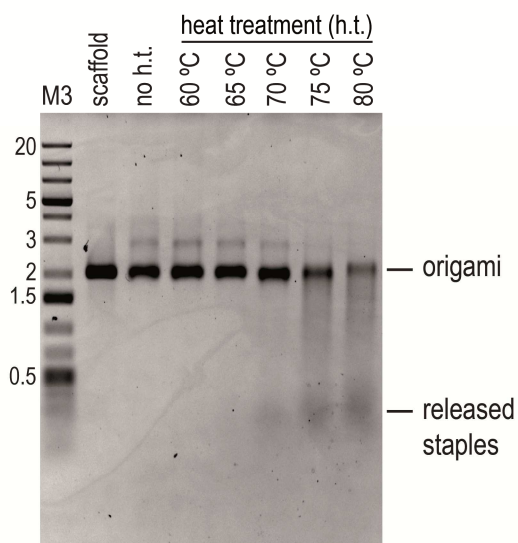

**Figure S5.** Analysis of the heat stability of non-ligated and chemically ligated DNA origami nanostructures using agarose gel electrophoresis (1 %). a) Analysis of the non-ligated DNA origami nanostructures before and after incubation for 10 min at the indicated temperatures. b) Analysis of the chemically ligated DNA origami nanostructures before and after incubation for 10 min at the indicated temperatures. Numbers next to bands of the DNA size marker (M3) indicate the corresponding DNA lengths.

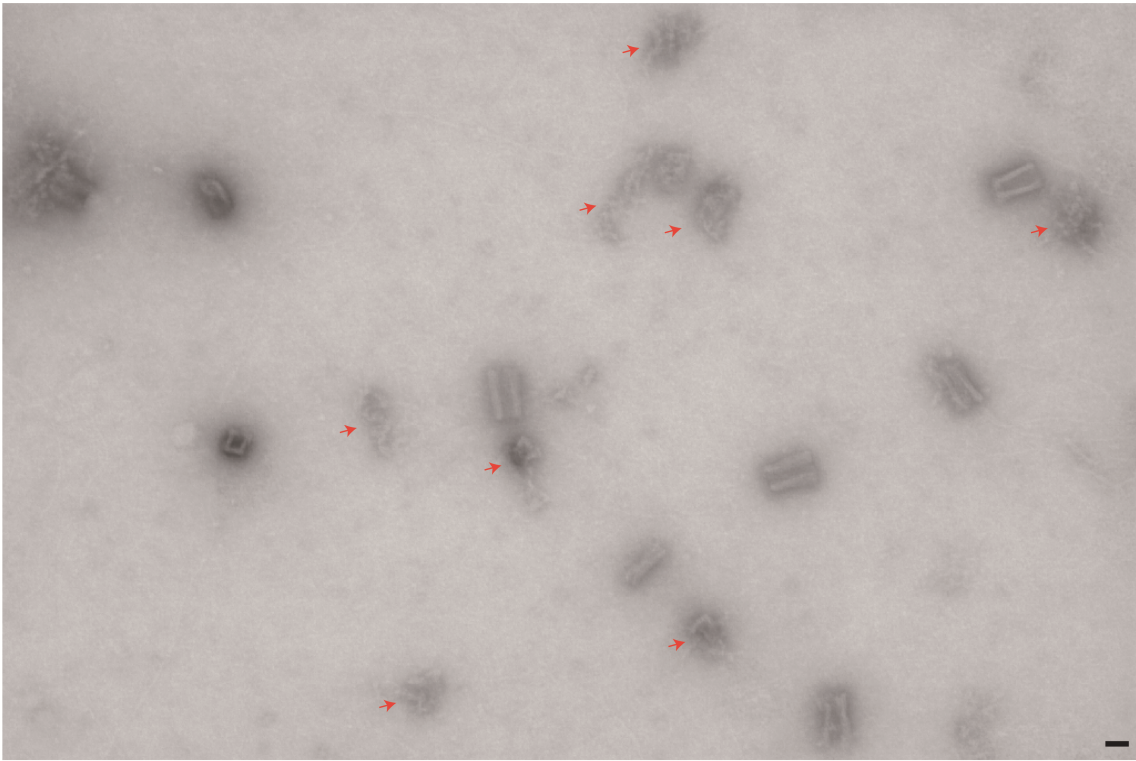

**Figure S6.** Overview tSEM image of non-ligated DNA origami nanostructures incubated for 10 min at 60 °C. Red arrows indicate disordered structures, i.e. origami nanostructures that already disassembled (Figure 3, main text). The scale bar corresponds to 20 nm.

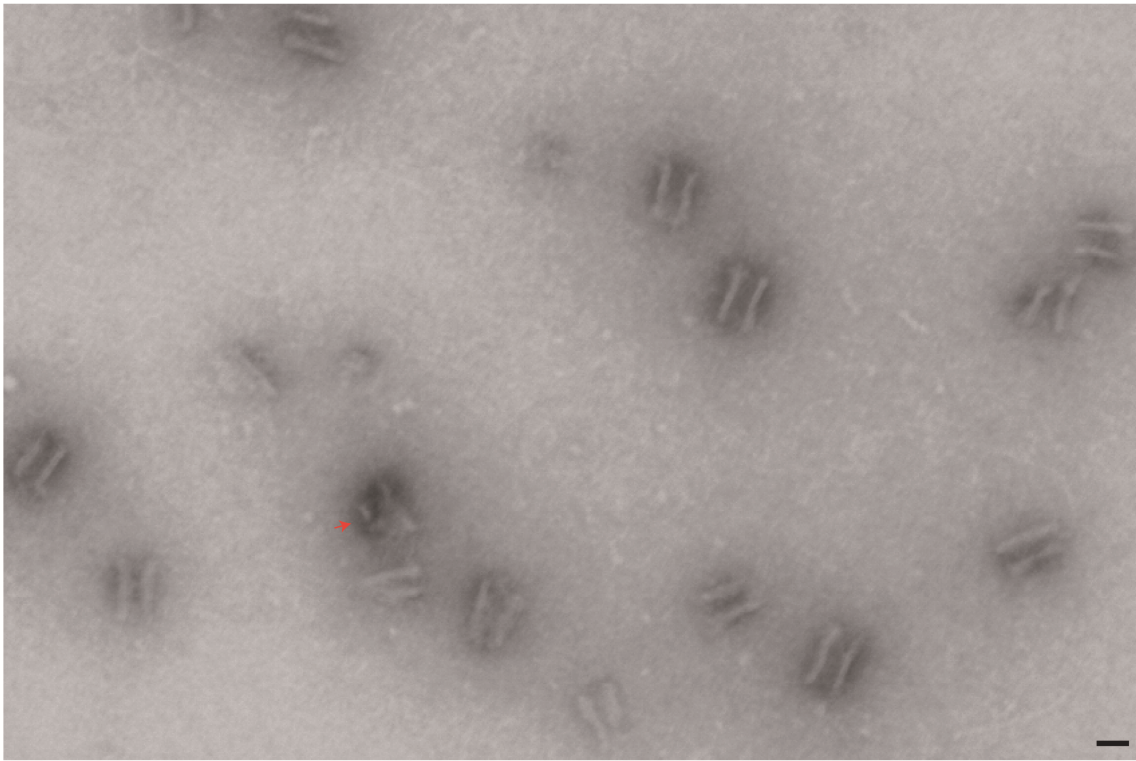

**Figure S7.** Overview tSEM image of the chemically ligated DNA origami nanostructures after incubation at 70 °C for 10 min. Red arrows indicate disordered structures, i.e. origami nanostructures that already disassembled (Figure 3, main text). The scale bar corresponds to 20 nm.



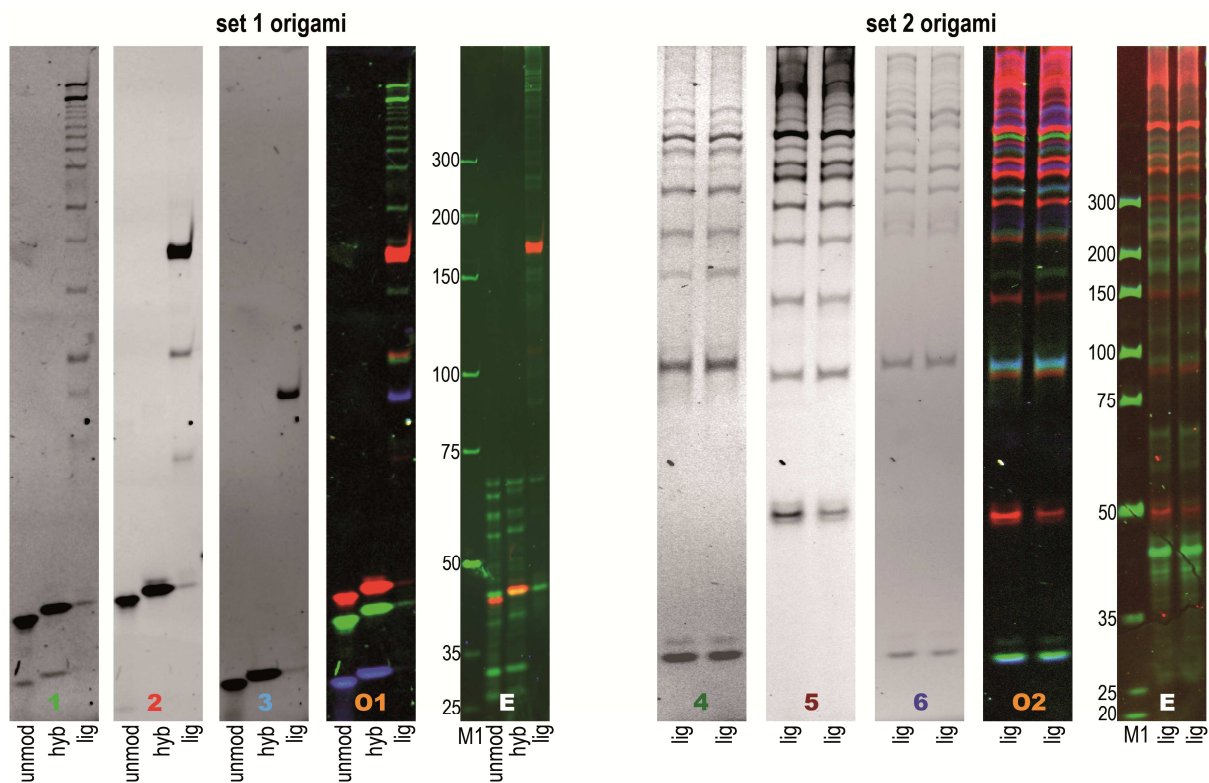

**Figure S8.** Enlarged views on the denaturing PAGE (8 %) analysis of the chain ligation (Figure 4, main text). Using different fluorescent labels for the first staple of a chain, chain ligations were probed in parallel in a single origami structure for chains 1-3 (set 1 origami, left side) as well as for chains 4-6 (set 2 origami, right side, see also main text incl. Figure 4 for further details). Gel images marked with numbers show the fluorescence emission of the first staple of the particular chain (Cy3 emission for chains 1 and 4, Cy5 emission for chains 2 and 5 and 6-FAM emission for chains 3 and 6). Gel images marked with O1 and O2 show false colour overlays of the emissions the chain starts of the particular origami structure. Gel images marked with E show the EtBr stained total DNA and the Cy5 emissions. Lane labels correspond to unmodified staples (unmod), non-ligated origami nanostructures (hyb) and chemically ligated origami structures (lig). Numbers next to the bands of the DNA size marker (M1) indicate the corresponding DNA lengths.

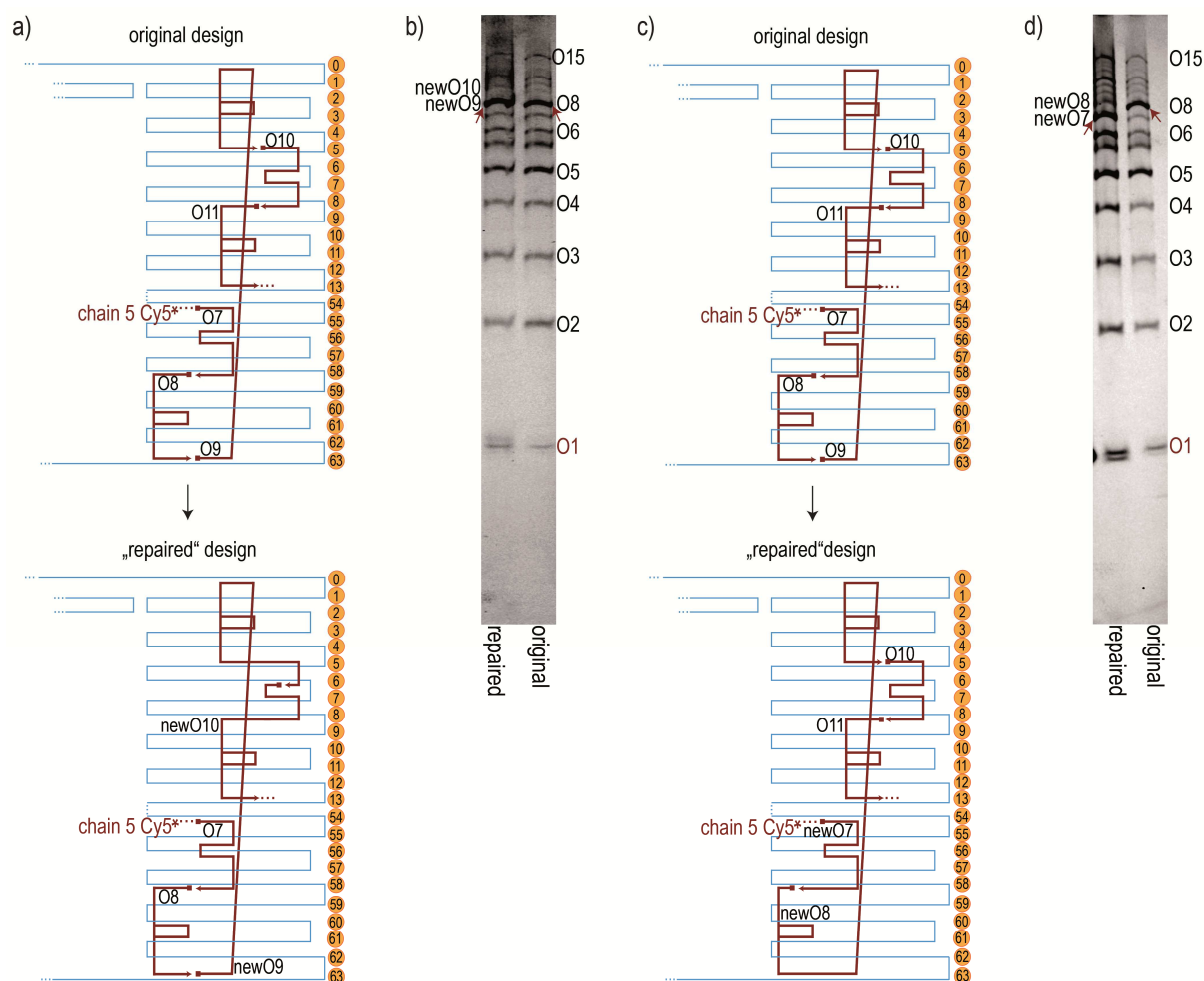

**Figure S9.** Identifying and 'repairing' design problems within an origami structure using chain ligation. (a) Enlarged view on the origami design containing oligonucleotides 9, 10 and 11 of chain 5 from set 2 origami (Figure S4 and Table S2) before (top) and after (bottom) the intended design repair. In the altered design two new staples (newO9 and newO10) replaced the original staples 9, 10 and 11 (Table S3). Helix numbers of the design are shown on the right. (b) Denaturing PAGE (8 %) analysis of the set 2 origami monitoring the terminal Cy5 label of chain 5 before and after the design repair (Figure 4, Figure S8). The chain ligation terminates with for the original design with high probability at staple 8 (see red arrow in right lane) indicating an assembly problem at this position. The altered design did not increase the ligation efficiency at this position (red arrow in left lane), such that the 'repair' was unsuccessful. (c) Enlarged view on the origami design containing oligonucleotides 7, 8 and 9 of chain 5 from set 2 origami (Figure S4, and Table S2) before (top) and after (bottom) another design repair. For this design alteration the new staples newO7 and newO8 replaced the original staples 7, 8 and 9 (Table S3). Helix numbers of the design are shown on the right. (d) Denaturing PAGE (8 %) analysis of chain 5 of set 2 origami before and after the design repair with newO7 and newO8 (Figure 4, Figure S8). Also in this case the inefficient ligation at step 8 could not be alleviated (see red arrows in both lanes).

**Table S1.** Ligation chain details of the set 1 origami (Figure 4, main text and Figure S3). Lengths of the individual staples and resulting chain length for a successful chain ligation including the given staple. The staple number (No.) provides the order of the staple with respect to the 5' end of the chain.

| No. | chain 1 (Cy3)       |                 | chain 2 (Cy5)       |                 | chain 3 (6-FAM)     |                 |
|-----|---------------------|-----------------|---------------------|-----------------|---------------------|-----------------|
|     | Staple length       | length of chain | Staple length       | length of chain | Staple length       | length of chain |
| 1   | 37 nt <sup>a)</sup> | 37 nt           | 41 nt <sup>a)</sup> | 41 nt           | 27 nt <sup>a)</sup> | 27 nt           |
| 2   | 36 nt               | 73 nt           | 28 nt               | 69 nt           | 59 nt               | 86 nt           |
| 3   | 28 nt               | 101 nt          | 33 nt               | 102 nt          |                     |                 |
| 4   | 32 nt               | 133 nt          | 54 nt               | 156 nt          |                     |                 |
| 5   | 35 nt               | 168 nt          |                     |                 |                     |                 |
| 6   | 32 nt               | 200 nt          |                     |                 |                     |                 |
| 7   | 56 nt               | 256 nt          |                     |                 |                     |                 |
| 8   | 32 nt               | 288 nt          |                     |                 |                     |                 |
| 9   | 32 nt               | 320 nt          |                     |                 |                     |                 |
| 10  | 32 nt               | 352 nt          |                     |                 |                     |                 |
| 11  | 40 nt               | 392 nt          |                     |                 |                     |                 |
| 12  | 28 nt               | 420 nt          |                     |                 |                     |                 |
| 13  | 32 nt               | 452 nt          |                     |                 |                     |                 |
| 14  | 28 nt               | 480 nt          |                     |                 |                     |                 |
| 15  | 32 nt               | 512 nt          |                     |                 |                     |                 |
| 16  | 21 nt               | 533 nt          |                     |                 |                     |                 |
| 17  | 32 nt               | 565 nt          |                     |                 |                     |                 |
| 18  | 28 nt               | 593 nt          |                     |                 |                     |                 |
| 19  | 32 nt               | 625 nt          |                     |                 |                     |                 |
| 20  | 53 nt               | 678 nt          |                     |                 |                     |                 |

a) Indicates the first staples of a chain that carries the indicated fluorescent label on its 5' end

**Table S2.** Ligation chain details of the set 2 origami (Figure 4, main text and Figure S4). Lengths of the individual staples and resulting chain length for a successful chain ligation including the given staple. The staple number (No.) provides the order of the staple with respect to the 5' end of the chain.

| No. | chain 4 (Cy3)       |                 | chain 5 (Cy5)       |                 | chain 6 (6-FAM)     |                 |
|-----|---------------------|-----------------|---------------------|-----------------|---------------------|-----------------|
|     | Staple length       | length of chain | Staple length       | length of chain | Staple length       | length of chain |
| 1   | 27 nt <sup>a)</sup> | 27 nt           | 48 nt <sup>a)</sup> | 48 nt           | 27 nt <sup>a)</sup> | 27 nt           |
| 2   | 56 nt               | 83 nt           | 32 nt               | 80 nt           | 56 nt               | 83 nt           |
| 3   | 64 nt               | 147 nt          | 28 nt               | 108 nt          | 64 nt               | 147 nt          |
| 4   | 40 nt               | 187 nt          | 34 nt               | 142 nt          | 40 nt               | 187 nt          |
| 5   | 60 nt               | 247 nt          | 30 nt               | 172 nt          | 28 nt               | 215 nt          |
| 6   | 28 nt               | 275 nt          | 56 nt               | 228 nt          | 32 nt               | 247 nt          |
| 7   | 32 nt               | 307 nt          | 32 nt               | 260 nt          | 49 nt               | 296 nt          |
| 8   | 50 nt               | 357 nt          | 32 nt               | 292 nt          | 34 nt               | 330 nt          |
| 9   | 43 nt               | 400 nt          | 40 nt               | 332 nt          | 30 nt               | 360 nt          |
| 10  | 32 nt               | 432 nt          | 28 nt               | 360 nt          | 40 nt               | 400 nt          |
| 11  | 32 nt               | 464 nt          | 32 nt               | 392 nt          | 32 nt               | 432 nt          |
| 12  | 32 nt               | 496 nt          | 49 nt               | 441 nt          | 32 nt               | 464 nt          |
| 13  | 32 nt               | 528 nt          | 32 nt               | 473 nt          | 56 nt               | 520 nt          |
| 14  | 52 nt               | 580 nt          | 28 nt               | 501 nt          | 28 nt               | 548 nt          |
| 15  | 32 nt               | 612 nt          | 57 nt               | 558 nt          | 32 nt               | 580 nt          |
| 16  | 28 nt               | 640 nt          |                     |                 | 35 nt               | 615 nt          |
| 17  | 39 nt               | 679 nt          |                     |                 | 32 nt               | 647 nt          |
| 18  | 32 nt               | 711 nt          |                     |                 | 28 nt               | 675 nt          |
| 19  | 31 nt               | 742 nt          |                     |                 | 56 nt               | 731 nt          |
| 20  | 24 nt               | 766 nt          |                     |                 | 64 nt               | 795 nt          |
| 21  | 50 nt               | 816 nt          |                     |                 | 67 nt               | 862 nt          |
| 22  | 46 nt               | 862 nt          |                     |                 |                     |                 |
| 23  | 32 nt               | 894 nt          |                     |                 |                     |                 |
| 24  | 32 nt               | 926 nt          |                     |                 |                     |                 |
| 25  | 32 nt               | 958 nt          |                     |                 |                     |                 |
| 26  | 32 nt               | 990 nt          |                     |                 |                     |                 |
| 27  | 37 nt               | 1,027 nt        |                     |                 |                     |                 |
| 28  | 38 nt               | 1,065 nt        |                     |                 |                     |                 |
| 29  | 26 nt               | 1,091 nt        |                     |                 |                     |                 |
| 30  | 50 nt               | 1,141 nt        |                     |                 |                     |                 |

a) Indicates the first staples of a chain that carries the indicated fluorescent label on its 5' end

**Table S3.** Sequences of the staples that were changed upon design ‘repairs’ (Figure 5 and Figure S9) as well as the sequences of the staples of the new design. For the altered designs, three successive original staple sequences were fused and split into two new staple sequences.

| <b>chain 1 of set 1 origami (Figure 5)</b>  |                                                                          |    |
|---------------------------------------------|--------------------------------------------------------------------------|----|
| Staple                                      | Sequence (5' to 3')                                                      | nt |
| O15                                         | ACAATCAAAGCCGAACGAACTGGCGAGCGCTA                                         | 32 |
| O16                                         | ATATCAGGAAGCGCAAATGAA                                                    | 21 |
| O17                                         | AATAGCAGAACAGCCACGCTAACGCGCGAGGC                                         | 32 |
| newO15                                      | ACAATCAAAGCCGAACGAACTGGCGAGCGCTAATATCAGGAA                               | 42 |
| newO16                                      | GCGCAAATGAAAATAGCAGAACAGCCACGCTAACGCGCGAGGC                              | 43 |
| <b>chain 5 of set 2 origami (Figure S9)</b> |                                                                          |    |
| Staple                                      | Sequence (5' to 3')                                                      | nt |
| O7                                          | CAGCCATTCTCAAACCTCAAATTAATTTTATAA                                        | 32 |
| O8                                          | TCAGTGAGGCAAGTGTCTTTGACGGCCGTA                                           | 32 |
| O9                                          | GCACTAAAGAACCTATACAAACAACCAGTAAGACCCCTCAG                                | 40 |
| newO7                                       | CAGCCATTCTCAAACCTCAAATTAATTTTATAATCAGT                                   | 37 |
| newO8                                       | GAGGCAAGTGTCTTTGACGGCCGTAAGCACTAAAGAACCTATACAAACAA-<br>CCAGTAAGACCCCTCAG | 67 |
| O9                                          | GCACTAAAGAACCTATACAAACAACCAGTAAGACCCCTCAG                                | 40 |
| O10                                         | AACCGCCATAATCAGGCATTTGCACCGT                                             | 28 |
| O11                                         | AATCAGTAGACATTCAAATTATCAAAAATACA                                         | 32 |
| newO9                                       | GCACTAAAGAACCTATACAAACAACCAGTAAGACCCCTCAGAACCGCCATA                      | 50 |
| newO10                                      | ATCAGGCATTTGCACCGTAATCAGTAGACATTCAAATTATCAAAAATACA                       | 50 |

## References

- 1 G. T. Hermanson, *Bioconjugate Techniques. Second Edition*, Academic Press, Cambridge, MA, 2008.
